# Supplementary material
Source: PubMed Central journal article supplement (PMC3463270)
Supplement: cr2012120x1.pdf [file cr2012120x1.pdf]

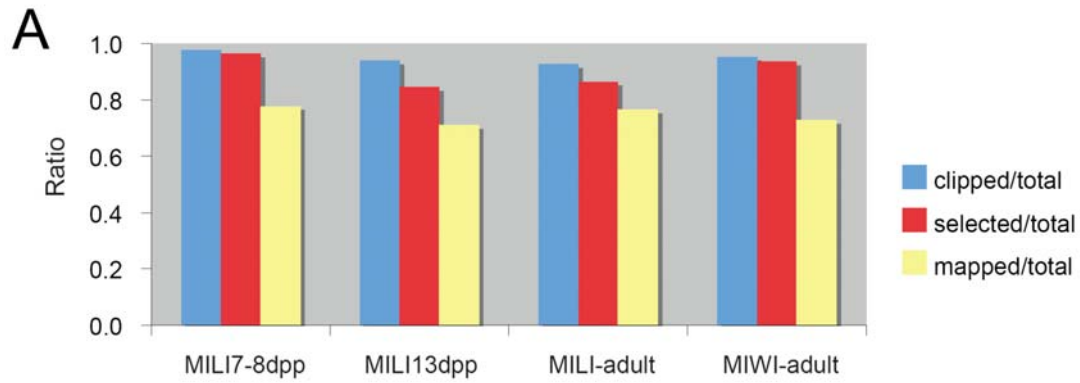

**B**

| <i>piRNA Library</i> | <i>Clone #</i> | <i>Read #</i> |
|----------------------|----------------|---------------|
| <b>MILI 7-8dpp</b>   | 35078          | 262458        |
| <b>MILI 13dpp</b>    | 61759          | 119361        |
| <b>MILI Adult</b>    | 34218          | 108570        |
| <b>MIWI Adult</b>    | 35286          | 55430         |

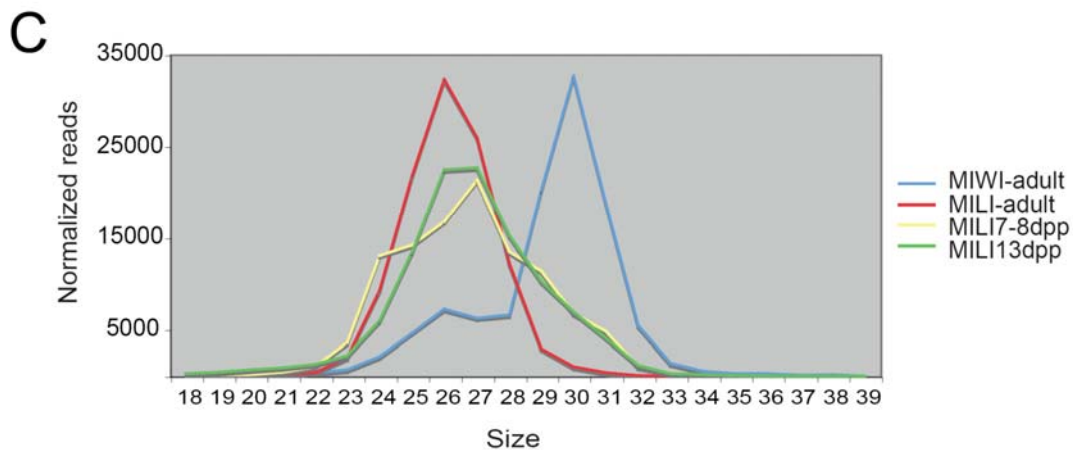

**Supplementary information, Figure S1** Overall profiles of MILI- and MIWI-associated piRNAs.

A, The percentages of the sequence reads from each library that are clipped, selected, and mapped. Preliminary processing of the four libraries yielded more than 90% successfully clipped sequences. More than 80% of the total clones were clippable with a size range of 18-35nt for MILI-associated piRNAs and 20-39nt for MIWI-associated piRNAs, that were selected for further analysis. Over 70% of the total clones could be mapped on the genome. B, Total read of the libraries. C, Size distribution of piRNAs from each of the four libraries. The MILI- and MIWI-associated piRNA libraries are abundant with piRNAs of 26-27nt and 30nt, respectively. The small RNA abundance is normalized to the sequencing depth.
