# Supplementary material
Source: PubMed Central journal article supplement (PMC3463270)
Supplement: cr2012120x4.pdf [file cr2012120x4.pdf]

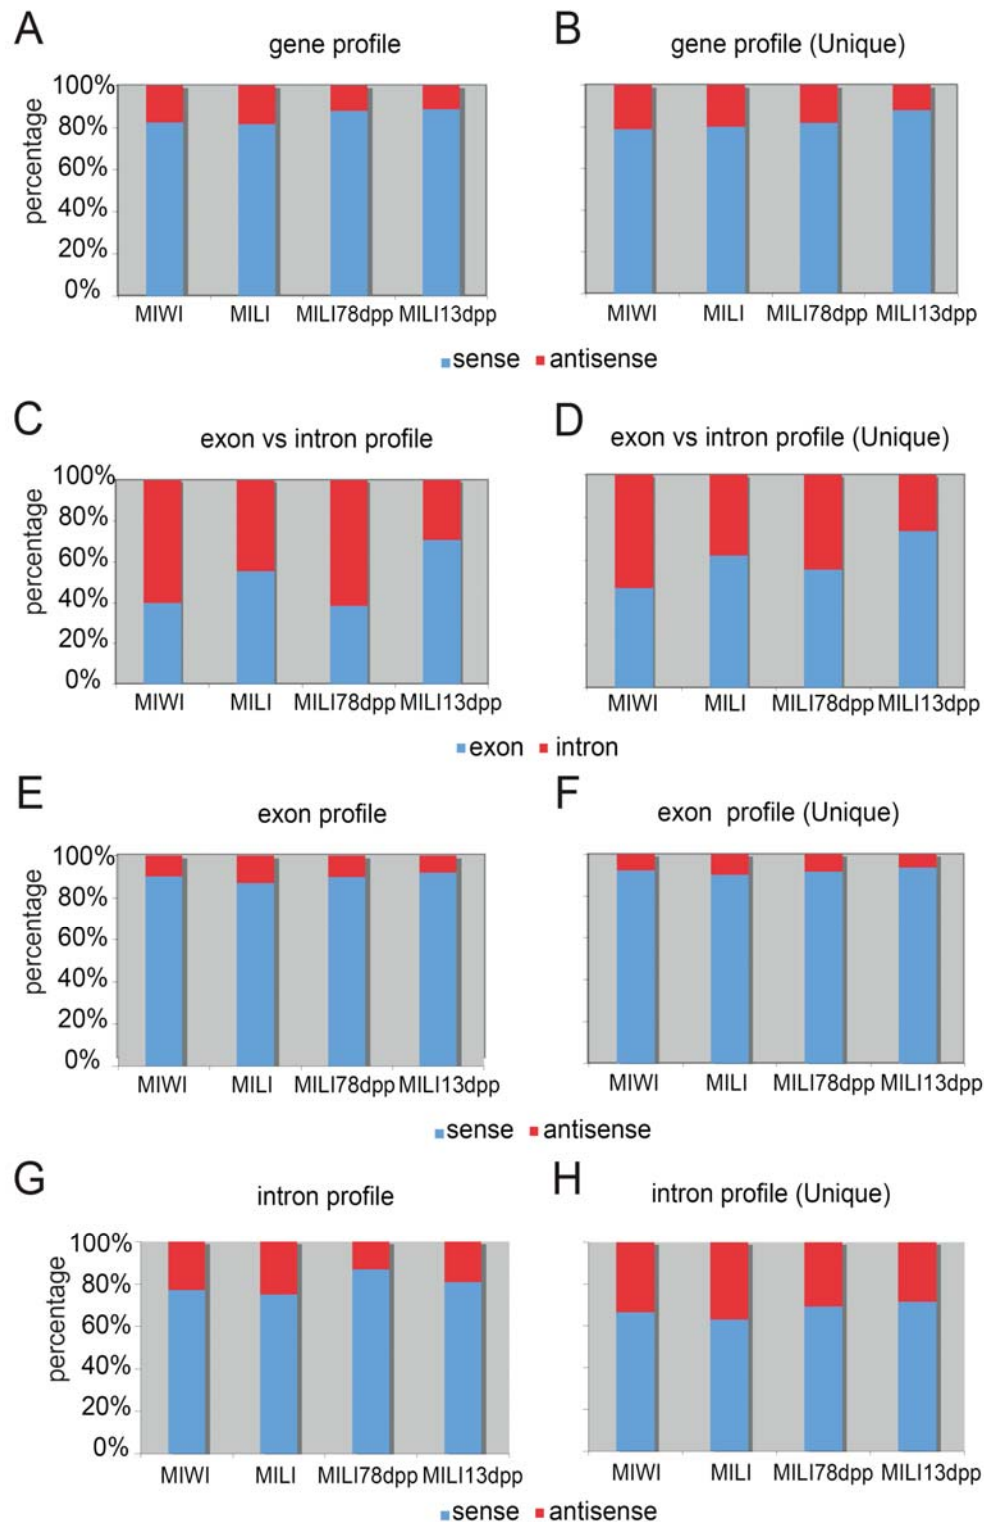

**Supplementary information, Figure S4** Profile of piRNAs corresponding to protein-coding genes. piRNAs corresponding to protein-coding genes are mostly derived from the sense strand (A-B). Intron-derived piRNAs are under-represented among the gene-derived piRNAs despite the overall larger size of introns relative to exons within a gene (C-D). Both exon-derived (E-F) and intron-derived (G-H) piRNAs are mainly derived from the sense strand. Panels on the right are based on only piRNAs with a single map on the genome (unique).
