# Supplementary material
Source: PubMed Central journal article supplement (PMC3463270)
Supplement: cr2012120x5.pdf [file cr2012120x5.pdf]

**Table S1: Genomic Loci of the MILI-associated piRNA clusters in the 7-8dpp testis.\***

| <b>Chromosome</b> | <b>Start</b> | <b>End</b> | <b>Span</b> | <b>RNA Amount</b> | <b>Rank</b> |
|-------------------|--------------|------------|-------------|-------------------|-------------|
| chr1              | 94887925     | 94893607   | 5683        | 89                | 46          |
| chr2              | 92389317     | 92429920   | 40604       | 461               | 8           |
| chr2              | 92431523     | 92443419   | 11897       | 132               | 30          |
| chr2              | 92379002     | 92387796   | 8795        | 84                | 49          |
| chr3              | 5860340      | 5863711    | 3372        | 233               | 18          |
| chr3              | 37379175     | 37380666   | 1492        | 55                | 71          |
| chr4              | 61880457     | 61887593   | 7137        | 142               | 28          |
| chr4              | 61894006     | 61900833   | 6828        | 137               | 29          |
| chr4              | 135182787    | 135189053  | 6267        | 102               | 38          |
| chr4              | 122132478    | 122132595  | 118         | 99                | 42          |
| chr4              | 121870845    | 121870962  | 118         | 99                | 43          |
| chr4              | 123511236    | 123517114  | 5879        | 64                | 60          |
| chr4              | 93984870     | 93990730   | 5861        | 60                | 67          |
| chr5              | 113748594    | 113790381  | 41788       | 807               | 2           |
| chr5              | 147072570    | 147072937  | 368         | 461               | 10          |
| chr5              | 150592946    | 150634038  | 41093       | 447               | 11          |
| chr5              | 115291504    | 115303668  | 12165       | 338               | 15          |
| chr5              | 115264368    | 115270113  | 5746        | 73                | 54          |
| chr6              | 127735404    | 127770056  | 34653       | 466               | 7           |
| chr6              | 3149757      | 3151601    | 1845        | 143               | 27          |
| chr6              | 127774399    | 127786716  | 12318       | 116               | 35          |
| chr6              | 128132887    | 128140671  | 7785        | 102               | 39          |
| chr6              | 81844243     | 81850377   | 6135        | 100               | 40          |
| chr7              | 80923771     | 80971373   | 47603       | 729               | 4           |
| chr7              | 80249257     | 80270863   | 21607       | 192               | 20          |
| chr7              | 77046802     | 77071804   | 25003       | 121               | 32          |
| chr7              | 132468952    | 132478032  | 9081        | 100               | 41          |
| chr7              | 80279879     | 80287154   | 7276        | 63                | 62          |
| chr7              | 82913257     | 82922819   | 9563        | 60                | 66          |
| chr7              | 80288858     | 80291077   | 2220        | 54                | 73          |
| chr8              | 94713605     | 94717791   | 4187        | 164               | 22          |
| chr8              | 112645970    | 112652569  | 6600        | 120               | 33          |
| chr8              | 95939015     | 95944597   | 5583        | 68                | 58          |
| chr8              | 28405365     | 28406672   | 1308        | 57                | 68          |
| chr8              | 119730712    | 119738252  | 7541        | 50                | 75          |
| chr9              | 67555244     | 67577831   | 22588       | 800               | 3           |
| chr9              | 54058276     | 54075808   | 17533       | 152               | 25          |
| chr9              | 54077817     | 54097486   | 19670       | 112               | 36          |
| chr9              | 67580144     | 67590451   | 10308       | 93                | 45          |
| chr9              | 67540066     | 67548214   | 8149        | 62                | 64          |
| chr9              | 56071421     | 56071748   | 328         | 57                | 69          |

|       |           |           |       |      |    |
|-------|-----------|-----------|-------|------|----|
| chrX  | 84483693  | 84483763  | 71    | 79   | 51 |
| chr10 | 75299895  | 75325531  | 25637 | 364  | 14 |
| chr10 | 62139182  | 62159053  | 19872 | 249  | 17 |
| chr10 | 66155272  | 66163654  | 8383  | 161  | 23 |
| chr10 | 11211776  | 11214588  | 2813  | 124  | 31 |
| chr10 | 62119362  | 62136729  | 17368 | 71   | 56 |
| chr10 | 85216400  | 85236412  | 20013 | 70   | 57 |
| chr10 | 86033131  | 86046568  | 13438 | 56   | 70 |
| chr11 | 108871476 | 108873401 | 1926  | 425  | 12 |
| chr11 | 103295262 | 103305153 | 9892  | 155  | 24 |
| chr11 | 103284394 | 103290945 | 6552  | 73   | 55 |
| chr12 | 99657968  | 99666459  | 8492  | 87   | 47 |
| chr12 | 99632277  | 99647522  | 15246 | 78   | 53 |
| chr12 | 100883305 | 100883861 | 557   | 51   | 74 |
| chr13 | 21261901  | 21262159  | 259   | 63   | 61 |
| chr14 | 24901384  | 24936443  | 35060 | 461  | 9  |
| chr14 | 20459492  | 20464928  | 5437  | 55   | 72 |
| chr15 | 74462946  | 74481698  | 18753 | 418  | 13 |
| chr15 | 78477907  | 78505507  | 27601 | 309  | 16 |
| chr15 | 59099448  | 59112845  | 13398 | 226  | 19 |
| chr15 | 59079318  | 59096758  | 17441 | 176  | 21 |
| chr15 | 83183906  | 83189223  | 5318  | 85   | 48 |
| chr15 | 82977448  | 82981083  | 3636  | 82   | 50 |
| chr15 | 86025202  | 86026723  | 1522  | 79   | 52 |
| chr15 | 74486413  | 74498549  | 12137 | 63   | 63 |
| chr15 | 72930312  | 72937798  | 7487  | 61   | 65 |
| chr16 | 57391226  | 57391784  | 559   | 119  | 34 |
| chr16 | 11143798  | 11144393  | 596   | 64   | 59 |
| chr17 | 27426967  | 27509312  | 82346 | 2374 | 1  |
| chr17 | 39979362  | 39985996  | 6635  | 571  | 5  |
| chr17 | 66556268  | 66578392  | 22125 | 152  | 26 |
| chr17 | 66533274  | 66551029  | 17756 | 96   | 44 |
| chr18 | 67199741  | 67229273  | 29533 | 547  | 6  |
| chr18 | 54858557  | 54859028  | 472   | 104  | 37 |

\* A total of 75 clusters were identified, with the largest one corresponding to the Chromosome 17:

27426967-27509312.
