# Supplementary material
Source: PubMed Central journal article supplement (PMC3463270)
Supplement: cr2012120x6.pdf [file cr2012120x6.pdf]

**Table S2: Genomic Loci of the MILI-associated piRNA clusters in the 13dpp testis.\***

| <b>Chromosome</b> | <b>Start</b> | <b>End</b> | <b>Span</b> | <b>RNA amount</b> | <b>Rank</b> |
|-------------------|--------------|------------|-------------|-------------------|-------------|
| chr1              | 94887932     | 94893607   | 5676        | 164               | 33          |
| chr1              | 133920309    | 133928783  | 8475        | 107               | 49          |
| chr1              | 158569164    | 158579120  | 9957        | 91                | 55          |
| chr1              | 90155762     | 90163061   | 7300        | 61                | 75          |
| chr1              | 93448649     | 93455727   | 7079        | 60                | 78          |
| chr2              | 92378945     | 92449195   | 70251       | 1524              | 2           |
| chr2              | 151227883    | 151245722  | 17840       | 54                | 91          |
| chr2              | 151074216    | 151092143  | 17928       | 52                | 101         |
| chr2              | 27256489     | 27257580   | 1092        | 50                | 104         |
| chr2              | 151140179    | 151158053  | 17875       | 50                | 106         |
| chr3              | 5860338      | 5864858    | 4521        | 158               | 38          |
| chr3              | 34771812     | 34777217   | 5406        | 54                | 89          |
| chr4              | 61880434     | 61900833   | 20400       | 571               | 14          |
| chr4              | 135182743    | 135190010  | 7268        | 124               | 44          |
| chr4              | 57370776     | 57375093   | 4318        | 74                | 64          |
| chr4              | 123509831    | 123518704  | 8874        | 64                | 74          |
| chr4              | 93985051     | 93992261   | 7211        | 60                | 77          |
| chr4              | 121869693    | 121870964  | 1272        | 58                | 79          |
| chr4              | 122131326    | 122132597  | 1272        | 58                | 80          |
| chr5              | 113748630    | 113793735  | 45106       | 1436              | 3           |
| chr5              | 150591171    | 150635027  | 43857       | 907               | 7           |
| chr5              | 115290388    | 115303619  | 13232       | 399               | 20          |
| chr5              | 147072570    | 147072937  | 368         | 258               | 24          |
| chr5              | 144524586    | 144530978  | 6393        | 76                | 63          |
| chr5              | 67775561     | 67789666   | 14106       | 57                | 81          |
| chr5              | 115262880    | 115270112  | 7233        | 55                | 85          |
| chr6              | 127732091    | 127772184  | 40094       | 844               | 8           |
| chr6              | 127774399    | 127788354  | 13956       | 183               | 30          |
| chr6              | 81844963     | 81850662   | 5700        | 176               | 31          |
| chr6              | 128132001    | 128140765  | 8765        | 165               | 32          |
| chr6              | 3148723      | 3154856    | 6134        | 159               | 37          |
| chr6              | 87912624     | 87945388   | 32765       | 156               | 39          |
| chr6              | 85936627     | 85940573   | 3947        | 65                | 71          |
| chr6              | 128788480    | 128790827  | 2348        | 53                | 95          |
| chr6              | 128708485    | 128710808  | 2324        | 53                | 96          |
| chr6              | 128745967    | 128749548  | 3582        | 53                | 97          |
| chr6              | 47727715     | 47738179   | 10465       | 52                | 100         |
| chr7              | 80923599     | 80972514   | 48916       | 1239              | 5           |
| chr7              | 80246886     | 80272986   | 26101       | 319               | 21          |
| chr7              | 77046802     | 77071025   | 24224       | 257               | 25          |
| chr7              | 82914449     | 82929831   | 15383       | 196               | 28          |

|       |           |           |       |      |     |
|-------|-----------|-----------|-------|------|-----|
| chr7  | 80279453  | 80295445  | 15993 | 149  | 42  |
| chr7  | 132472753 | 132478032 | 5280  | 80   | 60  |
| chr7  | 30919797  | 30926807  | 7011  | 77   | 62  |
| chr7  | 77074019  | 77078103  | 4085  | 56   | 83  |
| chr8  | 94711503  | 94722438  | 10936 | 313  | 22  |
| chr8  | 126062085 | 126147645 | 85561 | 161  | 36  |
| chr8  | 119729937 | 119739110 | 9174  | 138  | 43  |
| chr8  | 112645969 | 112654181 | 8213  | 116  | 46  |
| chr8  | 95937465  | 95947175  | 9711  | 87   | 56  |
| chr8  | 106872334 | 106879748 | 7415  | 57   | 82  |
| chr8  | 28403884  | 28406807  | 2924  | 50   | 107 |
| chr9  | 67551058  | 67591994  | 40937 | 1320 | 4   |
| chr9  | 54058487  | 54107604  | 49118 | 426  | 18  |
| chr9  | 67538834  | 67549396  | 10563 | 151  | 41  |
| chr9  | 67594509  | 67607992  | 13484 | 85   | 57  |
| chr9  | 43951539  | 43958288  | 6750  | 69   | 69  |
| chr9  | 56071379  | 56072208  | 830   | 52   | 99  |
| chr9  | 123369126 | 123372592 | 3467  | 51   | 103 |
| chrX  | 84483693  | 84483841  | 149   | 53   | 92  |
| chr10 | 75300007  | 75334701  | 34695 | 637  | 13  |
| chr10 | 62139240  | 62156734  | 17495 | 222  | 26  |
| chr10 | 66154103  | 66164446  | 10344 | 220  | 27  |
| chr10 | 85208506  | 85236412  | 27907 | 162  | 35  |
| chr10 | 62119340  | 62129374  | 10035 | 110  | 48  |
| chr10 | 60889632  | 60897821  | 8190  | 95   | 53  |
| chr10 | 126432968 | 126436670 | 3703  | 73   | 66  |
| chr10 | 86032313  | 86054914  | 22602 | 72   | 67  |
| chr10 | 11208901  | 11214898  | 5998  | 65   | 73  |
| chr10 | 82867375  | 82888787  | 21413 | 53   | 93  |
| chr10 | 127130048 | 127137524 | 7477  | 50   | 108 |
| chr11 | 103285424 | 103305273 | 19850 | 420  | 19  |
| chr11 | 108871456 | 108873413 | 1958  | 263  | 23  |
| chr11 | 102425779 | 102437170 | 11392 | 154  | 40  |
| chr11 | 79506303  | 79512428  | 6126  | 95   | 52  |
| chr11 | 107850147 | 107858897 | 8751  | 53   | 98  |
| chr12 | 99624827  | 99670579  | 45753 | 517  | 15  |
| chr12 | 99672243  | 99691743  | 19501 | 114  | 47  |
| chr12 | 82815093  | 82823307  | 8215  | 54   | 88  |
| chr13 | 53491847  | 53498243  | 6397  | 116  | 45  |
| chr13 | 23607318  | 23611563  | 4246  | 65   | 72  |
| chr13 | 52217542  | 52219276  | 1735  | 54   | 90  |
| chr14 | 24900381  | 24942603  | 42223 | 1142 | 6   |
| chr14 | 20459190  | 20465465  | 6276  | 97   | 51  |
| chr14 | 45552247  | 45563137  | 10891 | 94   | 54  |

|       |           |           |       |      |     |
|-------|-----------|-----------|-------|------|-----|
| chr14 | 45392711  | 45403866  | 11156 | 73   | 65  |
| chr15 | 59073970  | 59123391  | 49422 | 792  | 10  |
| chr15 | 74455020  | 74480936  | 25917 | 760  | 12  |
| chr15 | 78478142  | 78505688  | 27547 | 469  | 17  |
| chr15 | 83183351  | 83189329  | 5979  | 162  | 34  |
| chr15 | 72926701  | 72938730  | 12030 | 79   | 61  |
| chr15 | 74483728  | 74494558  | 10831 | 55   | 84  |
| chr15 | 103022189 | 103027291 | 5103  | 55   | 86  |
| chr15 | 86024894  | 86026723  | 1830  | 54   | 87  |
| chr15 | 82980168  | 82981087  | 920   | 52   | 102 |
| chr16 | 57391229  | 57392619  | 1391  | 187  | 29  |
| chr16 | 11143790  | 11144779  | 990   | 61   | 76  |
| chr16 | 33041126  | 33047917  | 6792  | 53   | 94  |
| chr17 | 27418566  | 27507373  | 88808 | 6719 | 1   |
| chr17 | 39975174  | 39986000  | 10827 | 808  | 9   |
| chr17 | 66538411  | 66578385  | 39975 | 474  | 16  |
| chr17 | 49251196  | 49252819  | 1624  | 82   | 59  |
| chr17 | 27681922  | 27705846  | 23925 | 69   | 68  |
| chr18 | 67191170  | 67246615  | 55446 | 781  | 11  |
| chr18 | 54858557  | 54859561  | 1005  | 84   | 58  |
| chr18 | 17002806  | 17003043  | 238   | 50   | 105 |
| chr19 | 10057226  | 10059484  | 2259  | 104  | 50  |
| chr19 | 8326735   | 8326782   | 48    | 66   | 70  |

\*A total of 108 clusters were identified, with the largest one corresponding to the Chromosome 17:

27418566-27507373.
