# Supplementary material
Source: PubMed Central journal article supplement (PMC3463270)
Supplement: cr2012120x7.pdf [file cr2012120x7.pdf]

**Table S3: Genomic Loci of the MILI-associated piRNA clusters in the adult testis.\***

| <b>Chromosome</b> | <b>Start</b> | <b>End</b> | <b>Span</b> | <b>RNA amount</b> | <b>Rank</b> |
|-------------------|--------------|------------|-------------|-------------------|-------------|
| chr1              | 94888870     | 94893634   | 4765        | 145               | 32          |
| chr1              | 93450346     | 93455467   | 5122        | 67                | 55          |
| chr1              | 93299656     | 93302160   | 2505        | 66                | 56          |
| chr1              | 127071598    | 127073794  | 2197        | 51                | 69          |
| chr2              | 92380788     | 92450839   | 70052       | 1409              | 3           |
| chr2              | 151074112    | 151091872  | 17761       | 65                | 57          |
| chr2              | 151227709    | 151245451  | 17743       | 64                | 59          |
| chr2              | 151139891    | 151166914  | 27024       | 59                | 64          |
| chr3              | 34771847     | 34775857   | 4011        | 63                | 61          |
| chr4              | 61880500     | 61900327   | 19828       | 540               | 13          |
| chr4              | 93983069     | 93999481   | 16413       | 178               | 29          |
| chr4              | 135182741    | 135186060  | 3320        | 133               | 34          |
| chr4              | 57369876     | 57375087   | 5212        | 109               | 40          |
| chr4              | 123511701    | 123519044  | 7344        | 88                | 45          |
| chr4              | 93947845     | 93957226   | 9382        | 54                | 67          |
| chr5              | 113747824    | 113789358  | 41535       | 1396              | 4           |
| chr5              | 150592877    | 150634018  | 41142       | 848               | 9           |
| chr5              | 115290134    | 115303474  | 13341       | 396               | 18          |
| chr5              | 144524559    | 144529880  | 5322        | 64                | 60          |
| chr5              | 115266957    | 115270158  | 3202        | 55                | 66          |
| chr6              | 127730419    | 127771420  | 41002       | 922               | 7           |
| chr6              | 127774113    | 127787830  | 13718       | 232               | 25          |
| chr6              | 81844166     | 81850732   | 6567        | 219               | 27          |
| chr6              | 128132896    | 128140699  | 7804        | 108               | 41          |
| chr6              | 87934442     | 87944158   | 9717        | 79                | 48          |
| chr6              | 85936678     | 85941161   | 4484        | 73                | 54          |
| chr6              | 85061102     | 85065368   | 4267        | 61                | 62          |
| chr7              | 80919842     | 80971840   | 51999       | 1239              | 5           |
| chr7              | 80246107     | 80271868   | 25762       | 450               | 15          |
| chr7              | 77043786     | 77071011   | 27226       | 391               | 19          |
| chr7              | 80276986     | 80291077   | 14092       | 151               | 31          |
| chr7              | 132469343    | 132478032  | 8690        | 102               | 43          |
| chr7              | 77073438     | 77079815   | 6378        | 77                | 50          |
| chr8              | 94713403     | 94719938   | 6536        | 251               | 24          |
| chr8              | 112645754    | 112654220  | 8467        | 134               | 33          |
| chr8              | 95935421     | 95947174   | 11754       | 105               | 42          |
| chr8              | 28405303     | 28406820   | 1518        | 65                | 58          |
| chr9              | 67540067     | 67591829   | 51763       | 1420              | 2           |
| chr9              | 54058304     | 54105341   | 47038       | 606               | 12          |
| chr9              | 67594868     | 67607981   | 13114       | 75                | 52          |
| chr10             | 75299561     | 75328801   | 29241       | 494               | 14          |

|       |           |           |       |      |    |
|-------|-----------|-----------|-------|------|----|
| chr10 | 66144323  | 66169530  | 25208 | 273  | 23 |
| chr10 | 62139240  | 62154412  | 15173 | 232  | 26 |
| chr10 | 85207982  | 85235948  | 27967 | 155  | 30 |
| chr10 | 62116309  | 62136247  | 19939 | 129  | 36 |
| chr10 | 86032317  | 86055477  | 23161 | 96   | 44 |
| chr10 | 86075350  | 86087105  | 11756 | 51   | 70 |
| chr11 | 103285424 | 103305861 | 20438 | 384  | 20 |
| chr11 | 107855133 | 107860483 | 5351  | 75   | 53 |
| chr12 | 99624828  | 99649538  | 24711 | 423  | 17 |
| chr12 | 99651139  | 99666345  | 15207 | 282  | 22 |
| chr12 | 99669917  | 99688058  | 18142 | 117  | 38 |
| chr13 | 53493568  | 53498573  | 5006  | 76   | 51 |
| chr13 | 52217542  | 52219349  | 1808  | 52   | 68 |
| chr14 | 24901004  | 24940575  | 39572 | 860  | 8  |
| chr14 | 20448367  | 20464907  | 16541 | 116  | 39 |
| chr14 | 45553492  | 45560731  | 7240  | 78   | 49 |
| chr14 | 45393143  | 45402621  | 9479  | 60   | 63 |
| chr15 | 59080561  | 59133973  | 53413 | 834  | 10 |
| chr15 | 74463657  | 74479070  | 15414 | 679  | 11 |
| chr15 | 78482282  | 78501666  | 19385 | 449  | 16 |
| chr15 | 83183878  | 83190689  | 6812  | 132  | 35 |
| chr15 | 74480911  | 74497289  | 16379 | 83   | 46 |
| chr15 | 72927269  | 72937716  | 10448 | 79   | 47 |
| chr17 | 27419151  | 27506266  | 87116 | 3714 | 1  |
| chr17 | 66552897  | 66574593  | 21697 | 305  | 21 |
| chr17 | 66537536  | 66551029  | 13494 | 191  | 28 |
| chr17 | 49250577  | 49252801  | 2225  | 120  | 37 |
| chr17 | 66501107  | 66503722  | 2616  | 56   | 65 |
| chr18 | 67191573  | 67244906  | 53334 | 957  | 6  |

\*A total of 70 clusters were identified, with the largest one corresponding to the Chromosome 17:

27419151-27506266.
