# Supplementary material
Source: PubMed Central journal article supplement (PMC3463270)
Supplement: cr2012120x8.pdf [file cr2012120x8.pdf]

**Table S4: Genomic Loci of the MIWI-associated piRNA clusters in the adult testis.\***

| <b>Chromosome</b> | <b>Start</b> | <b>End</b> | <b>Span</b> | <b>RNA Number</b> | <b>Rank</b> |
|-------------------|--------------|------------|-------------|-------------------|-------------|
| chr1              | 94888987     | 94893607   | 4621        | 227               | 30          |
| chr1              | 127071502    | 127074372  | 2871        | 62                | 77          |
| chr1              | 93448708     | 93455427   | 6720        | 57                | 82          |
| chr2              | 92380959     | 92441826   | 60868       | 1591              | 4           |
| chr2              | 151228183    | 151246051  | 17869       | 227               | 31          |
| chr2              | 151074606    | 151092472  | 17867       | 210               | 33          |
| chr2              | 151139850    | 151157681  | 17832       | 202               | 36          |
| chr2              | 150967040    | 150983542  | 16503       | 173               | 38          |
| chr3              | 34771840     | 34776717   | 4878        | 116               | 53          |
| chr4              | 93982271     | 93998273   | 16003       | 423               | 17          |
| chr4              | 61881436     | 61900028   | 18593       | 393               | 20          |
| chr4              | 93947310     | 93964818   | 17509       | 282               | 26          |
| chr4              | 93971338     | 93979134   | 7797        | 160               | 41          |
| chr4              | 57369784     | 57375078   | 5295        | 152               | 43          |
| chr4              | 123511853    | 123519041  | 7189        | 111               | 55          |
| chr4              | 135182787    | 135186029  | 3243        | 110               | 56          |
| chr5              | 113749553    | 113788689  | 39137       | 1457              | 5           |
| chr5              | 150592876    | 150634145  | 41270       | 1077              | 10          |
| chr5              | 115285136    | 115303474  | 18339       | 441               | 16          |
| chr5              | 135636189    | 135640246  | 4058        | 80                | 68          |
| chr5              | 144524594    | 144529406  | 4813        | 67                | 74          |
| chr5              | 115265036    | 115270158  | 5123        | 58                | 80          |
| chr6              | 127732810    | 127769762  | 36953       | 1257              | 8           |
| chr6              | 127774170    | 127787193  | 13024       | 384               | 21          |
| chr6              | 81844374     | 81850732   | 6359        | 267               | 28          |
| chr6              | 128132895    | 128140811  | 7917        | 167               | 40          |
| chr6              | 85061463     | 85065210   | 3748        | 127               | 50          |
| chr6              | 85937670     | 85940985   | 3316        | 88                | 65          |
| chr6              | 87934143     | 87943572   | 9430        | 77                | 70          |
| chr6              | 128394211    | 128399989  | 5779        | 56                | 84          |
| chr7              | 80924685     | 80971833   | 47149       | 1423              | 6           |
| chr7              | 77044220     | 77069059   | 24840       | 764               | 12          |
| chr7              | 80246439     | 80271102   | 24664       | 652               | 13          |
| chr7              | 80277540     | 80291391   | 13852       | 214               | 32          |
| chr7              | 132470860    | 132476515  | 5656        | 197               | 37          |
| chr7              | 77028010     | 77034372   | 6363        | 109               | 57          |
| chr7              | 77073763     | 77080913   | 7151        | 90                | 63          |
| chr7              | 30921514     | 30923871   | 2358        | 73                | 72          |
| chr7              | 60162611     | 60169054   | 6444        | 71                | 73          |
| chr8              | 94713437     | 94719938   | 6502        | 280               | 27          |
| chr8              | 112646309    | 112655064  | 8756        | 206               | 35          |

---

|       |           |           |       |      |    |
|-------|-----------|-----------|-------|------|----|
| chr8  | 95938499  | 95947203  | 8705  | 134  | 47 |
| chr8  | 28405133  | 28407486  | 2354  | 75   | 71 |
| chr9  | 67539711  | 67592442  | 52732 | 1789 | 2  |
| chr9  | 54058269  | 54101976  | 43708 | 1134 | 9  |
| chr9  | 67594298  | 67600494  | 6197  | 106  | 58 |
| chr9  | 43952563  | 43958858  | 6296  | 95   | 61 |
| chr9  | 67602188  | 67607873  | 5686  | 61   | 78 |
| chr10 | 75307259  | 75325871  | 18613 | 329  | 23 |
| chr10 | 66148693  | 66168754  | 20062 | 304  | 25 |
| chr10 | 62139989  | 62151646  | 11658 | 231  | 29 |
| chr10 | 85220319  | 85233858  | 13540 | 156  | 42 |
| chr10 | 86032563  | 86045944  | 13382 | 134  | 48 |
| chr10 | 18516918  | 18523472  | 6555  | 126  | 51 |
| chr10 | 62119668  | 62135905  | 16238 | 121  | 52 |
| chr10 | 86079901  | 86086606  | 6706  | 112  | 54 |
| chr10 | 75300602  | 75305516  | 4915  | 95   | 60 |
| chr10 | 127131487 | 127137230 | 5744  | 89   | 64 |
| chr10 | 85208506  | 85218444  | 9939  | 60   | 79 |
| chr11 | 103288151 | 103310285 | 22135 | 410  | 18 |
| chr11 | 107855806 | 107859766 | 3961  | 84   | 66 |
| chr12 | 99625594  | 99666775  | 41182 | 1286 | 7  |
| chr12 | 99683737  | 99688646  | 4910  | 106  | 59 |
| chr12 | 99675282  | 99682185  | 6904  | 95   | 62 |
| chr13 | 53493507  | 53498949  | 5443  | 63   | 76 |
| chr13 | 51002406  | 51008446  | 6041  | 56   | 83 |
| chr14 | 24901384  | 24916148  | 14765 | 591  | 15 |
| chr14 | 24917971  | 24939198  | 21228 | 397  | 19 |
| chr14 | 45554448  | 45562333  | 7886  | 169  | 39 |
| chr14 | 45394534  | 45401665  | 7132  | 150  | 44 |
| chr14 | 20457068  | 20466645  | 9578  | 135  | 46 |
| chr14 | 25181680  | 25188846  | 7167  | 79   | 69 |
| chr15 | 59079318  | 59112875  | 33558 | 1048 | 11 |
| chr15 | 74465534  | 74479999  | 14466 | 597  | 14 |
| chr15 | 78482282  | 78501278  | 18997 | 333  | 22 |
| chr15 | 83184428  | 83189175  | 4748  | 132  | 49 |
| chr15 | 72927678  | 72937765  | 10088 | 66   | 75 |
| chr15 | 74482436  | 74489404  | 6969  | 52   | 85 |
| chr17 | 27427454  | 27503051  | 75598 | 1953 | 1  |
| chr17 | 66555175  | 66574261  | 19087 | 320  | 24 |
| chr17 | 66537887  | 66550530  | 12644 | 207  | 34 |
| chr17 | 39983298  | 39985146  | 1849  | 148  | 45 |
| chr17 | 49251571  | 49252746  | 1176  | 58   | 81 |
| chr18 | 67188773  | 67228995  | 40223 | 1636 | 3  |
| chr19 | 37330374  | 37335586  | 5213  | 82   | 67 |

---

\*A total of 85 clusters were identified, with the largest one corresponding to the Chromosome 17:  
27427454-27503051.
